# Supplementary material
Source: PubMed Central journal article supplement (PMC4967499)
Supplement: NIHMS789819-supplement-1.pdf [file NIHMS789819-supplement-1.pdf]

21 SUPPLEMENTAL FIGURES

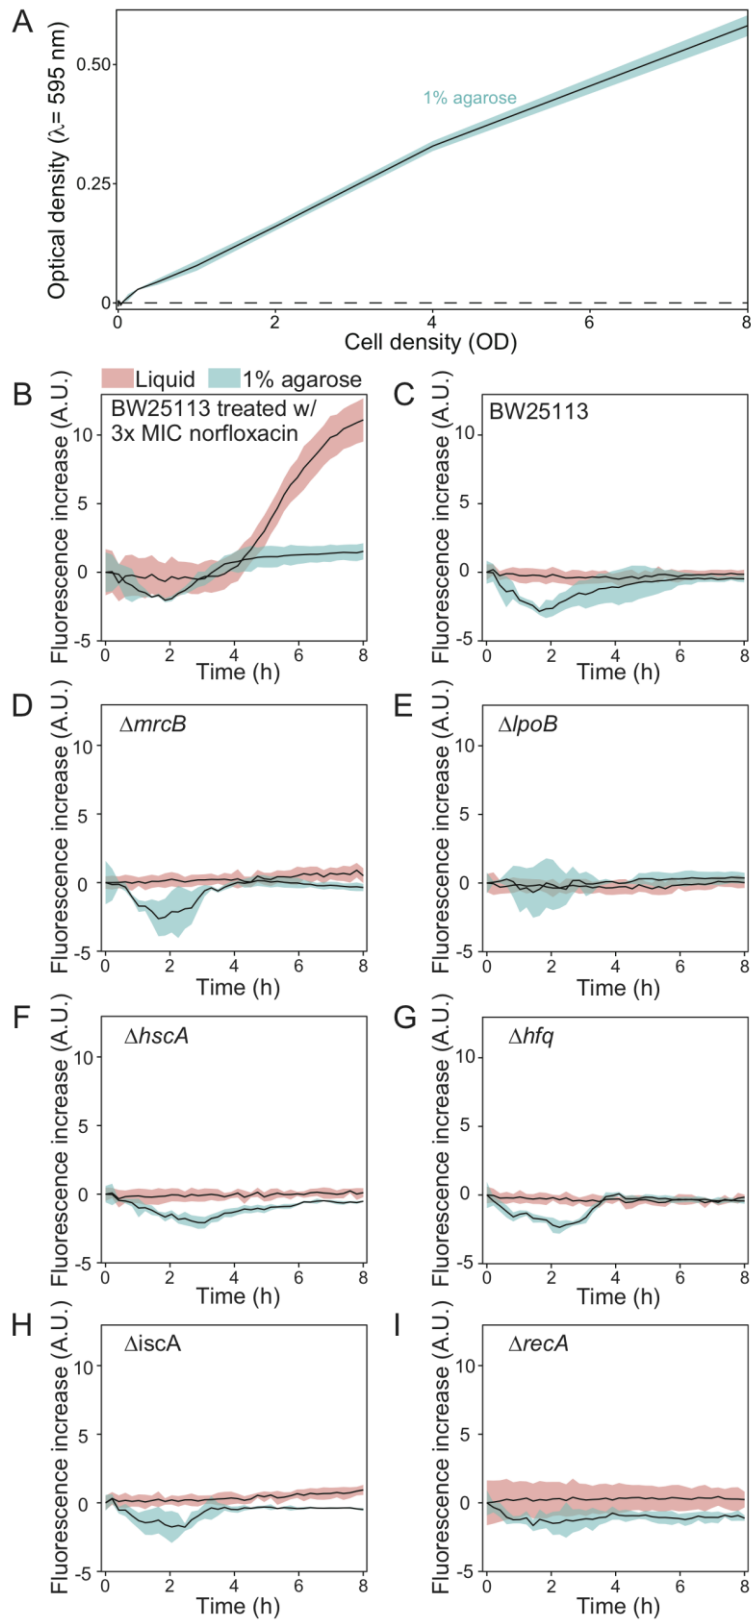

23 **Figure S1: Measurement of optical density and SOS response of *E. coli* cells**  
24 **embedded in 1% agarose, related to Figure 1.**

25 (A) Optical density of *E. coli* BW25113 cells embedded in 1% agarose exhibits  
26 an approximately linear increase with increasing cell density. Shaded  
27 region represents one standard deviation above and below mean growth  
28 curve ( $n = 3$  curves).

29 (B) When *E. coli* BW25113 cells were treated with norfloxacin at three times  
30 the minimum inhibitory concentration (MIC), we observed induction of  
31 the SOS response in both liquid and agarose. Cells with a *sulA* promoter  
32 fusion to GFP were grown in wells of a 96-well plate and fluorescence ( $\lambda_{\text{ex}}$   
33 = 485 nm,  $\lambda_{\text{em}} = 515$  nm) was quantified using a plate reader. To normalize  
34 fluorescence signal to cell density, the optical density was monitored at  $\lambda =$   
35 595 nm. Shaded regions represent one standard deviation above and  
36 below mean growth curves ( $n = 3$  biological replicates). A.U., arbitrary  
37 units.

38 (C-I) SOS induction was negligible in both liquid and agarose for wild-type  
39 cells and six mutants with large-magnitude GRABS scores. Optical density  
40 and fluorescence was monitored as in (B).

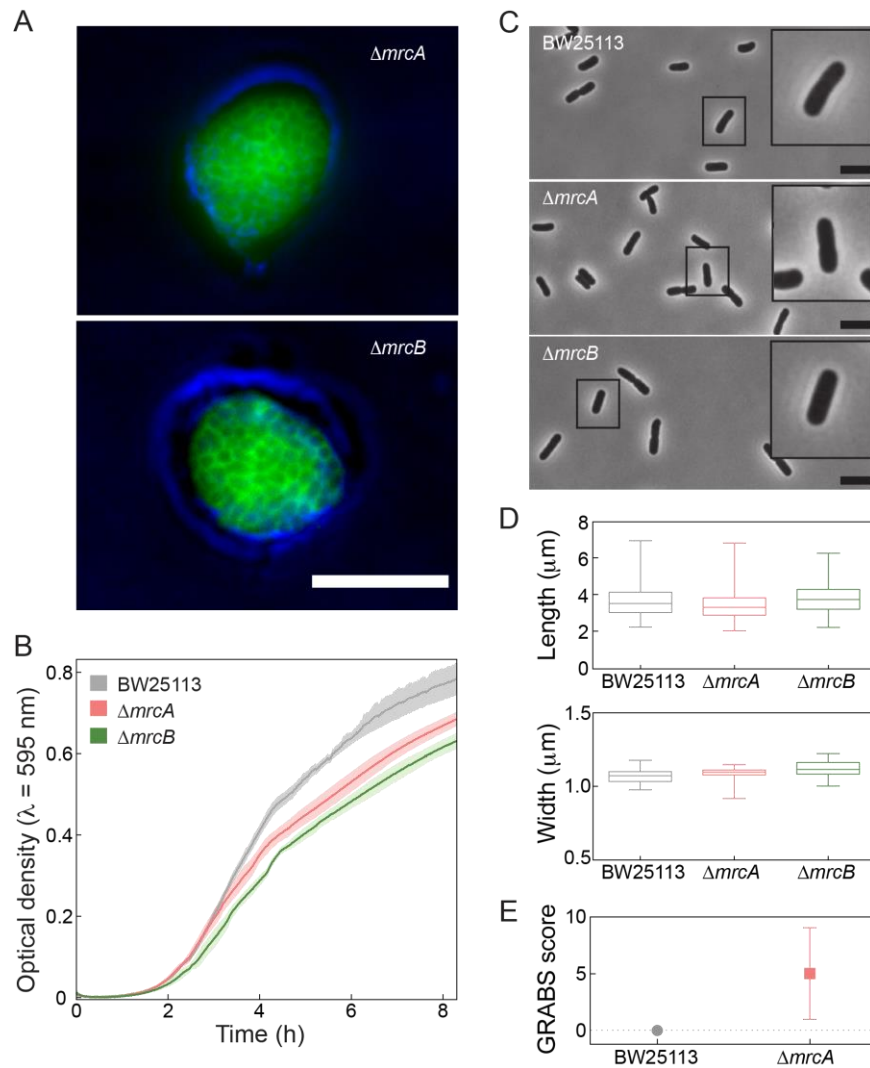

41

42 **Figure S2:  $\Delta mrcA$  and  $\Delta mrcB$  cells have distinct mechanical properties, yet**  
 43 **their growth rates in liquid and cell morphology in liquid and agarose are**  
 44 **similar to each other, related to Figure 2.**

45 A)  $\Delta mrcA$  and  $\Delta mrcB$  cells do not exhibit substantial changes in cell size  
 46 or shape after 8 h of growth embedded in 1% agarose. Blue is a false color  
 47 of the phase-contrast image. Green is a false color of the  
 48 fluorescence channel from FM4-64 membrane stain. Scale bar: 10  $\mu\text{m}$ .

49 B)  $\Delta mrcA$  and  $\Delta mrcB$  cells have similar growth rates, with slight growth-  
50 rate deficiencies relative to wild-type, in liquid LB. Growth curves  
51 were measured by monitoring optical absorbance. Solid lines represent  
52 the mean over  $n = 3$  curves. Shaded regions represent one standard  
53 deviation away from the mean. Maximum growth rates, obtained by  
54 fitting to a Gompertz relation: (BW25113,  $0.01 \text{ min}^{-1}$ ;  $\Delta mrcA$ ,  $0.0072$   
55  $\text{min}^{-1}$ ;  $\Delta mrcB$ ,  $0.0077 \text{ min}^{-1}$ ).

56 C) Phase-contrast images of *E. coli* BW25113,  $\Delta mrcA$ , and  $\Delta mrcB$  cells  
57 grown in liquid LB. Scale bar:  $5 \mu\text{m}$ .

58 D)  $\Delta mrcA$  and  $\Delta mrcB$  cells have similar cellular dimensions as wild-type  
59 cells ( $n \geq 217$  cells for each strain). Error bars represent one standard  
60 deviation from the mean.

61 E)  $\Delta mrcA$  cells have a GRABS score indicating that their stiffness is  
62 similar to wild-type cells. By definition, wild-type cells have a GRABS  
63 score of zero because all measurements are normalized to the wells  
64 containing wild-type cells. Error bars are one standard deviation away  
65 from the mean ( $n = 4$ ).

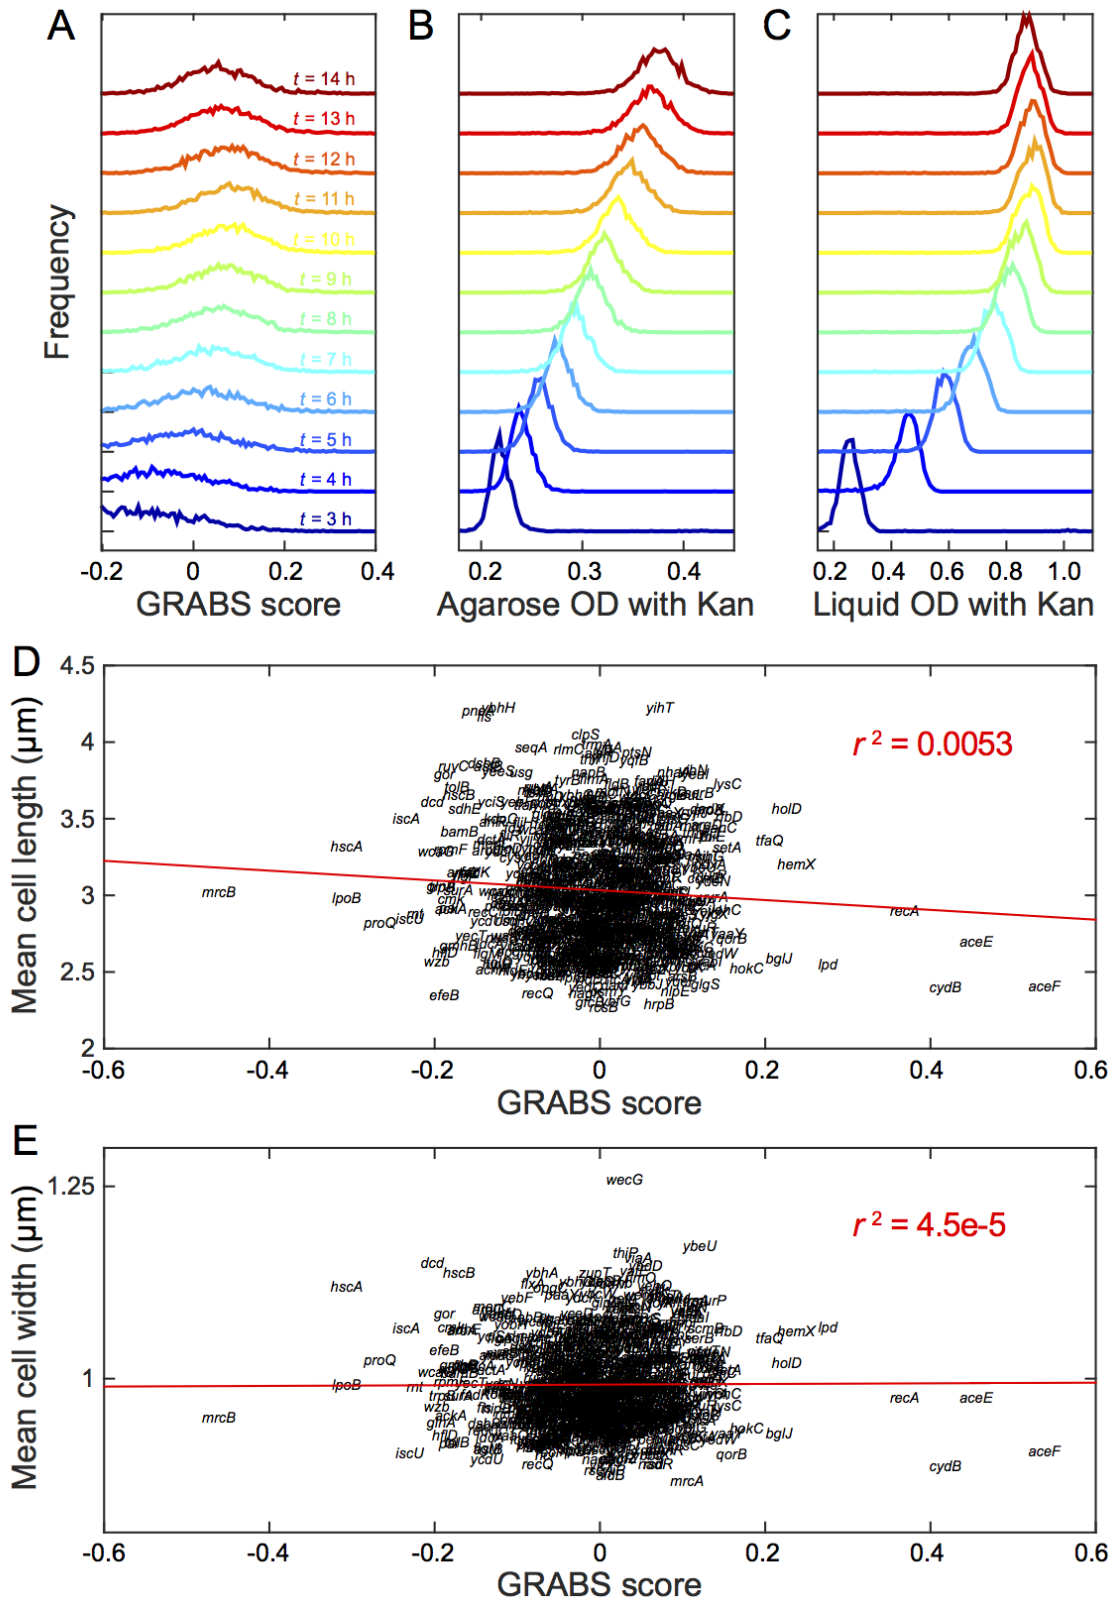

67 **Figure S3: Distributions of GRABS scores over time for all Keio strains and**  
68 **their correlation to cellular dimensions, related to Figure 2.**

69 (A) Distribution of GRABS scores over time. GRABS scores were calculated as  
70 described in the Extended Experimental Procedures, but with the time  
71 point of the final OD measurement varied from  $t = 3$  h to  $t = 14$  h. Curves  
72 are shown with variable shifts along the  $y$ -axis for visual clarity. The  
73 largest range of GRABS scores occurred after  $\sim 8$  h of growth.

74 (B) Distribution of OD values for agarose-embedded growth over time. Kan,  
75 kanamycin.

76 (C) Distribution of OD values for liquid growth over time. Kan, kanamycin.

77 (D) GRABS scores are not significantly correlated with average cell width,  $n \geq$   
78 100 cells for each strain. (Extended Experimental Methods;  $p = 0.075$ )

79 (E) GRABS scores are not significantly correlated with average cell length,  $n \geq$   
80 100 cells for each strain. (Extended Experimental Methods;  $p = 0.68$ )

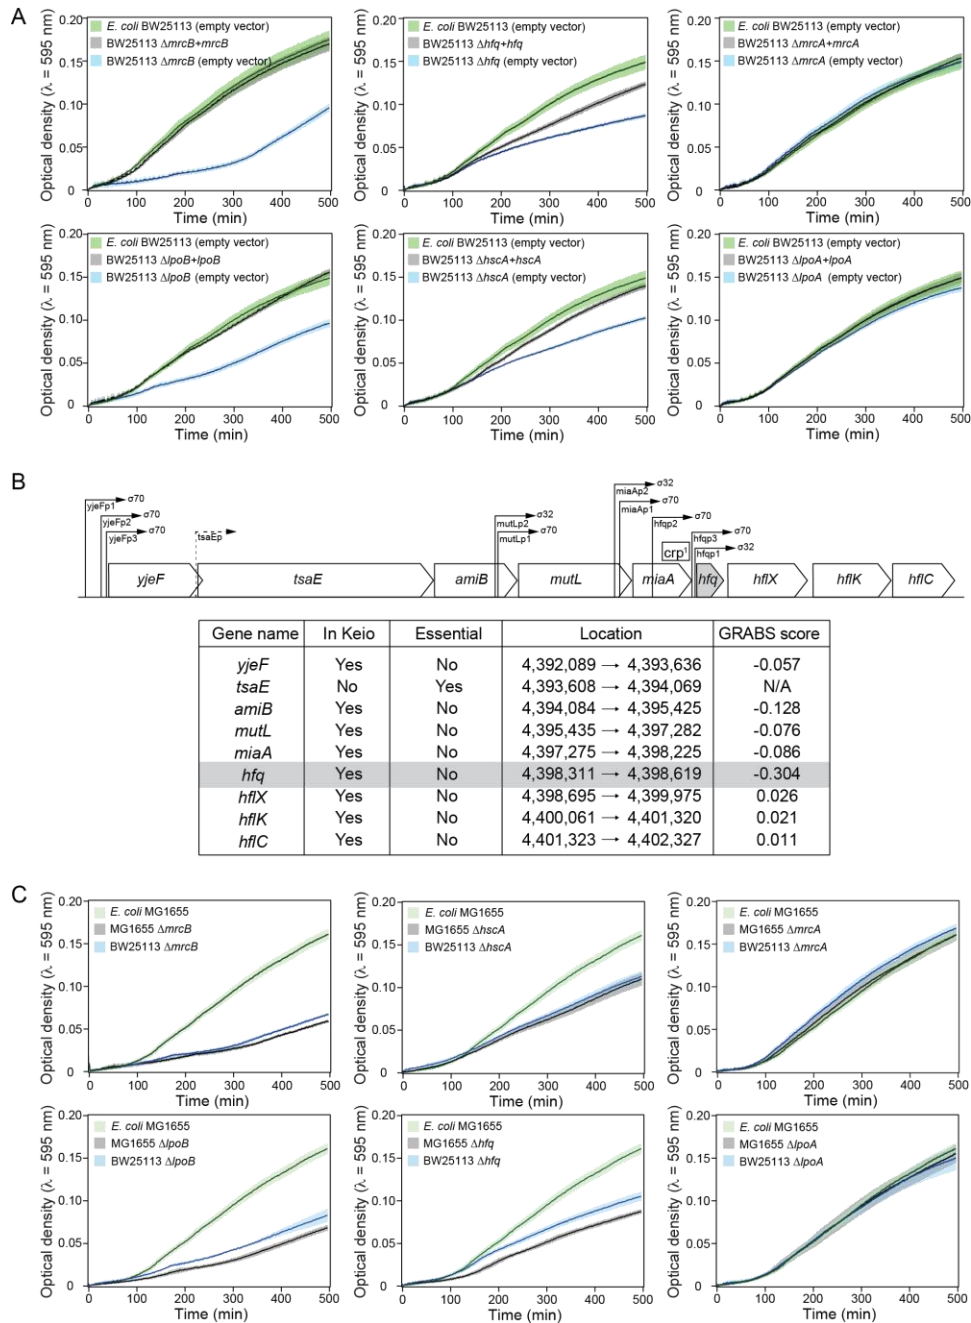

81

82 **Figure S4: Clean deletions in *E. coli* MG1655 and complementation studies**

83 **validate GRABS measurements of Keio strains, related to Figure 2.**

84 **A) Complementation of four genes that yielded large decreases in GRABS**

85 **score (*mrcB*, *lpoB*, *hfq*, and *hscA*) and two genes that produced**



86 essentially no stiffness change (*mrcA* and *lpoA*) resulted in recovery of  
87 mechanical defects when the cells were embedded in 1% agarose.  
88 Average growth curves (solid lines) of agarose-embedded *E. coli*  
89 BW25113 cells with an empty vector (green) compared to growth  
90 curves of Keio BW25113 mutants complemented in *trans* indicate 80-  
91 100% recovery after 8 h in  $\Delta mrcB$ ,  $\Delta lpoB$ ,  $\Delta hfq$ , and  $\Delta hscA$  and no  
92 change in  $\Delta mrcA$  and  $\Delta lpoA$ . Shaded regions represent one standard  
93 deviation above and below mean growth curves ( $n = 6$ ).

94 B) We detected no mechanical phenotypes in deletions of genes  
95 downstream of *hfq* in the operon containing *hfq*. *tsaE* is not included in  
96 the Keio collection and therefore we did not test it.

97 C) The phenotypes of *E. coli* MG1655 mutants embedded in agarose are  
98 quantitatively similar to those of the corresponding BW25113 mutants  
99 after 8 h. Mean agarose-embedded growth curves of *E. coli* MG1655  
100 (green) and selected gene deletions in MG1655 (black) and BW25113  
101 (blue). Shaded regions represent one standard deviation above and  
102 below the mean ( $n = 6$ ).

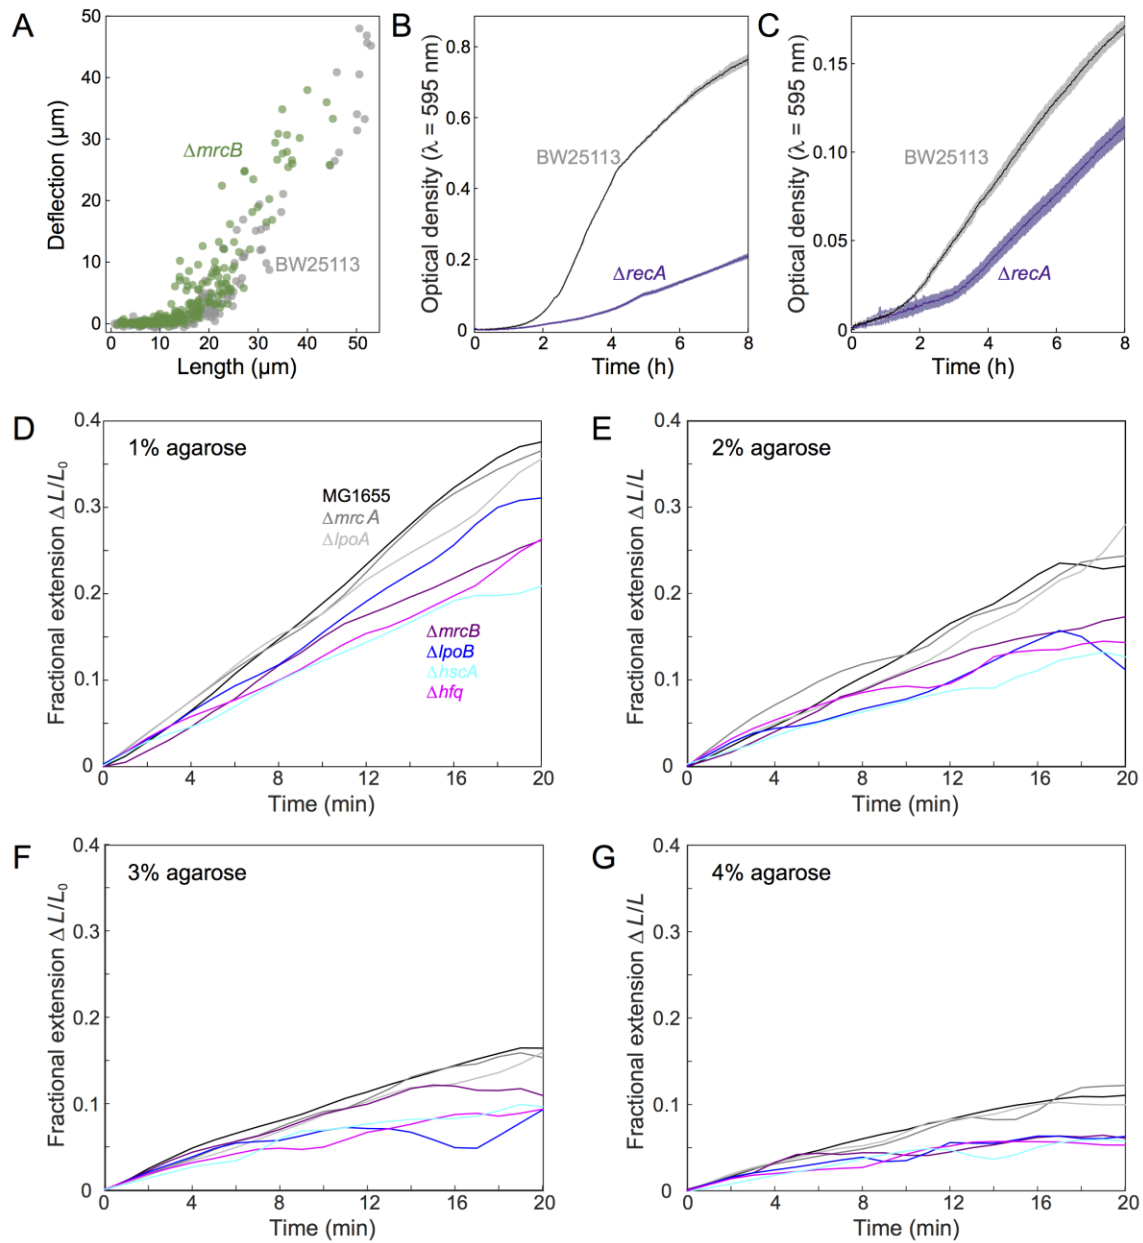

103

104 **Figure S5: Responses of *E. coli* mutants to external force, related to Figure 3**

105 **and Figure 4.**

106 (A) Deflection of cells in microfluidic bending device. Greater deflection of

107  $\Delta mrcB$  cells relative to wild-type cells of the same length indicates a

108 decrease in cell stiffness. Circles represent deflection values along the flow  
109 direction for individual cells ( $n > 200$  cells, two independent experiments).

110 (B)  $\Delta recA$  cells exhibit much slower growth in liquid than wild-type BW25113  
111 cells. Solid lines are means of  $n = 3$  growth curves; shaded regions  
112 represent one standard deviation about the mean.

113 (C)  $\Delta recA$  cells exhibit similar growth in agarose as wild-type BW25113 cells.  
114 Solid lines are means of  $n = 3$  growth curves; shaded regions represent one  
115 standard deviation about the mean.

116 (D-G) Single-cell, microscopy-based measurements of elongation inhibition  
117 agree with GRABS data. Average fractional elongation curves while  
118 embedded in 1-4% agarose gels for wild-type and six deletion strains of *E.*  
119 *coli* MG1655. The  $\Delta mrcB$ ,  $\Delta lpoB$ ,  $\Delta hfq$ ,  $\Delta hscA$  mutants consistently display  
120 increased inhibition of elongation compared to wild-type,  $\Delta mrcA$ , and  
121  $\Delta lpoA$  cells, as predicted by GRABS scores.  $L_0$ , initial cell length;  $\Delta L$ , the  
122 change in length relative to  $t = 0$ . Curves are averages over single-cell  
123 trajectories and were smoothed over a 5-min window. The number of cells  
124 measured decreases over the course of the experiment as some cell  
125 trajectories become difficult to track; the initial number of trajectories for a  
126 given mutant and agarose concentration ranged from 26-79 across  
127 experiments.

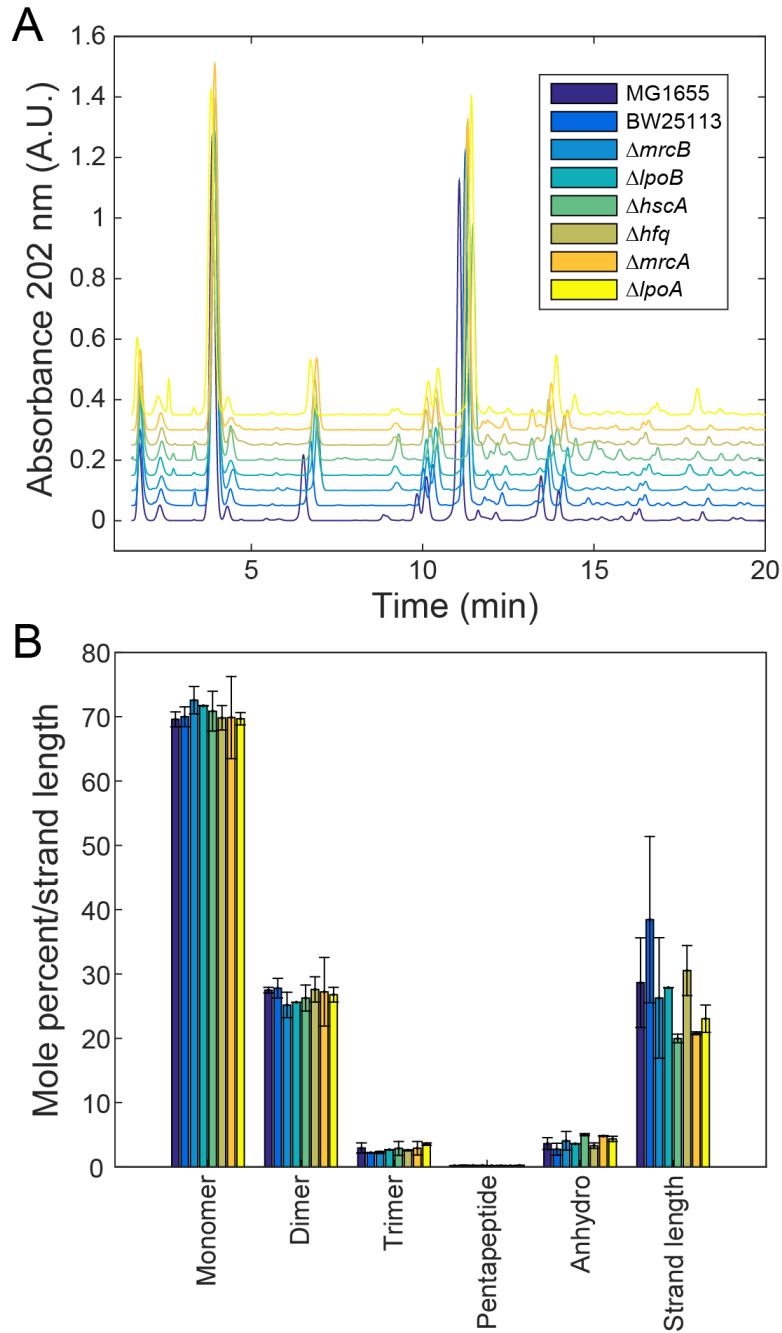

128

129 **Figure S6: UPLC analysis of mutants shows no striking differences in**  
 130 **peptidoglycan composition between wildtype and several mutants with most**  
 131 **negative GRABS scores, related to Figure 3.**

132 (A) Chromatograms of purified cell walls from *E. coli* MG1655, BW25113, and  
133 six Keio mutants, including four with large, negative GRABS scores  
134 ( $\Delta mrcB$ ,  $\Delta hscA$ ,  $\Delta lpoB$ , and  $\Delta hfq$ ) and two with GRABS scores close to zero  
135 ( $\Delta mrcA$  and  $\Delta lpoA$ ). Cell walls were purified and digested, and samples  
136 were analyzed using UPLC (Extended Experimental Procedures).  
137 Chromatograms were normalized to have the same integrated total  
138 absorbance and overlaid with baselines staggered for easier comparison.  
139 No substantial differences among the chromatograms were evident.

140 (B) Molar fractions of monomers, dimers, trimers, pentapeptides, and  
141 anhydro peaks, as well as the glycan strand length computed from total  
142 anhydro fraction, were quantified. The low abundance of anhydro species  
143 typically leads to greater variability in the calculation of average strand  
144 length.

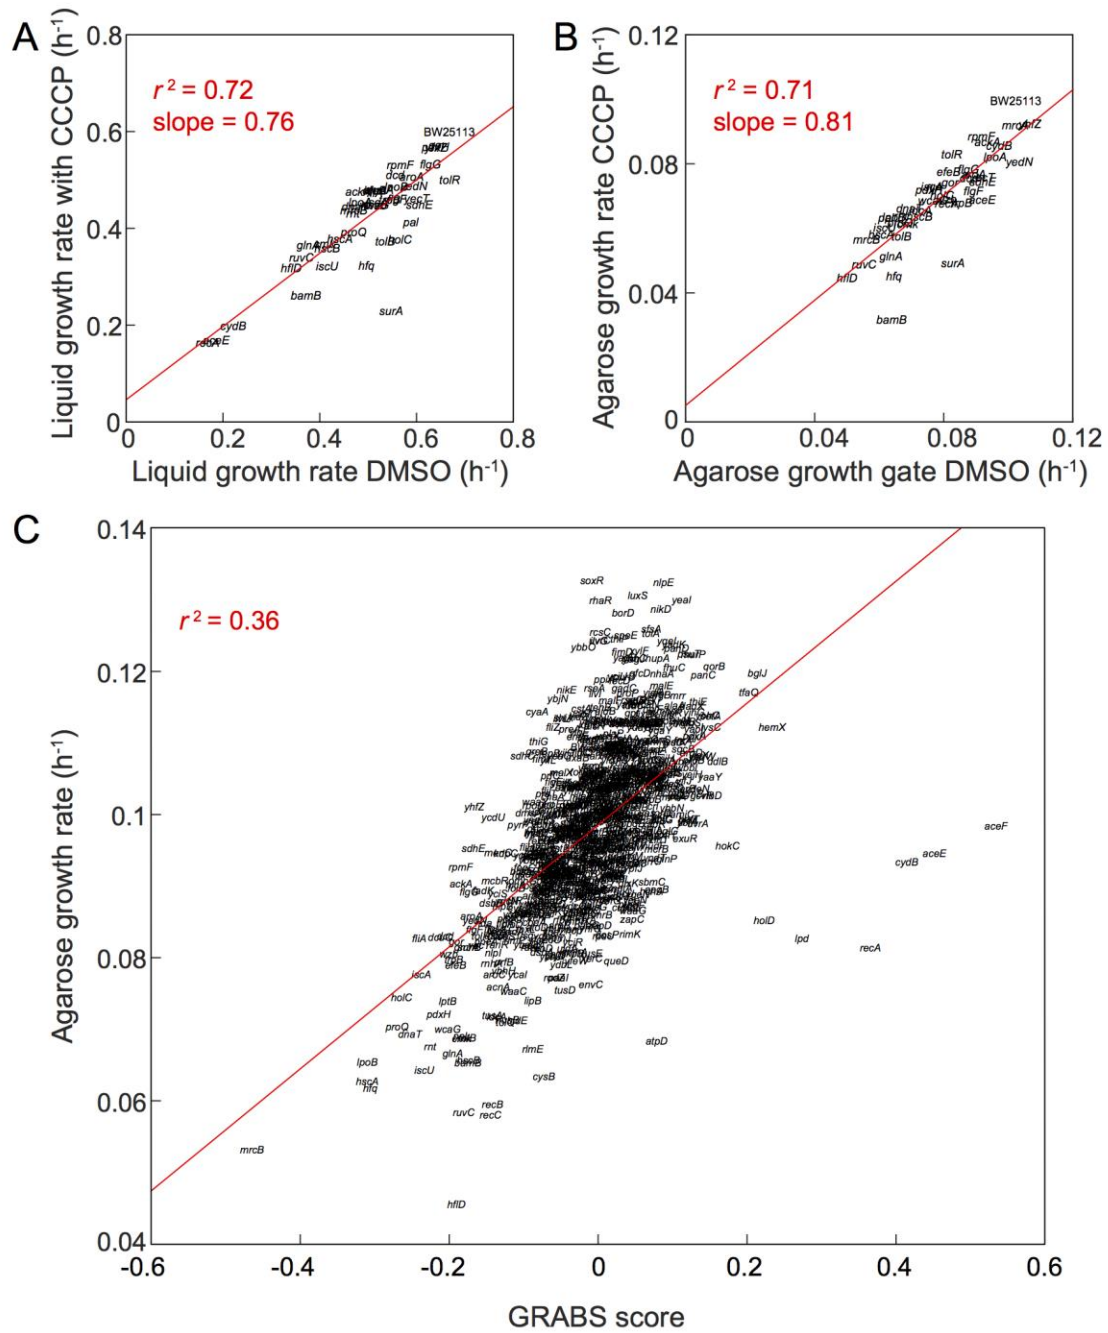

145

146 **Figure S7: Carbonyl cyanide *m*-chlorophenyl hydrazone (CCCP) generally**  
 147 **reduces growth rates and the relation of the GRABS score to maximal growth**  
 148 **rates in agarose, related to Figure 5 and Figure 2.**

149 (A) Fractional growth-rate of Keio mutants treated with CCCP in liquid.  
150 DMSO, dimethyl sulfoxide..

151 (B) Fractional growth-rate of Keio mutants treated with CCCP in agarose is  
152 reduced compared to liquid as evidenced by the difference in slopes.  
153 DMSO, dimethyl sulfoxide.

154 (C) GRABS scores are correlated with maximal growth rates in agarose.  
155 Growth rates were obtained by fitting growth curves for encapsulated  
156 cells with a Gompertz relation. The highly significant correlation ( $p < 10^{-81}$ )  
157 indicates that agarose growth rate is a reasonable proxy for GRABS score,  
158 potentially simplifying experimental design and analysis, although this  
159 simplification is less accurate for some mutants.

## 160 SUPPLEMENTAL TABLES

161

162 Table S1. Gene Ontology (GO) enrichment of GRABS hits, related to Figure 2

163 and Figure 3.

| GO Term    | Counts | Definition                                                                      |
|------------|--------|---------------------------------------------------------------------------------|
| GO:0016226 | 3      | iron-sulfur cluster assembly                                                    |
| GO:0009242 | 2      | colanic acid biosynthetic process                                               |
| GO:0043165 | 2      | Gram-negative-bacterium-type cell outer membrane assembly                       |
| GO:0006457 | 3      | protein folding                                                                 |
| GO:0043213 | 2      | bacteriocin transport                                                           |
| GO:0006260 | 3      | DNA replication                                                                 |
| GO:0015949 | 2      | nucleobase-containing small molecule interconversion                            |
| GO:0000162 | 1      | tryptophan biosynthetic process                                                 |
| GO:0006082 | 1      | organic acid metabolic process                                                  |
| GO:0006083 | 1      | acetate metabolic process                                                       |
| GO:0006085 | 1      | acetyl-CoA biosynthetic process                                                 |
| GO:0006105 | 1      | succinate metabolic process                                                     |
| GO:0006220 | 1      | pyrimidine nucleotide metabolic process                                         |
| GO:0006226 | 1      | dUMP biosynthetic process                                                       |
| GO:0006229 | 1      | dUTP biosynthetic process                                                       |
| GO:0006267 | 1      | pre-replicative complex assembly involved in nuclear cell cycle DNA replication |
| GO:0006542 | 1      | glutamine biosynthetic process                                                  |
| GO:0006568 | 1      | tryptophan metabolic process                                                    |
| GO:0006749 | 1      | glutathione metabolic process                                                   |
| GO:0007059 | 1      | chromosome segregation                                                          |
| GO:0009220 | 1      | pyrimidine ribonucleotide biosynthetic process                                  |
| GO:0009399 | 1      | nitrogen fixation                                                               |
| GO:0009443 | 1      | pyridoxal 5'-phosphate salvage                                                  |
| GO:0010608 | 1      | posttranscriptional regulation of gene expression                               |
| GO:0015740 | 1      | C4-dicarboxylate transport                                                      |
| GO:0017013 | 1      | protein flavinylation                                                           |
| GO:0019395 | 1      | fatty acid oxidation                                                            |



|            |   |                                                                 |
|------------|---|-----------------------------------------------------------------|
| GO:0019413 | 1 | acetate biosynthetic process                                    |
| GO:0019542 | 1 | propionate biosynthetic process                                 |
| GO:0019676 | 1 | ammonia assimilation cycle                                      |
| GO:0032298 | 1 | positive regulation of DNA-dependent DNA replication initiation |
| GO:0033212 | 1 | iron assimilation                                               |
| GO:0040033 | 1 | negative regulation of translation, ncRNA-mediated              |
| GO:0042351 | 1 | 'de novo' GDP-L-fucose biosynthetic process                     |
| GO:0042780 | 1 | tRNA 3'-end processing                                          |
| GO:0042816 | 1 | vitamin B6 metabolic process                                    |
| GO:0044092 | 1 | negative regulation of molecular function                       |
| GO:0045975 | 1 | positive regulation of translation, ncRNA-mediated              |
| GO:0046080 | 1 | dUTP metabolic process                                          |
| GO:0051050 | 1 | positive regulation of transport                                |
| GO:0051085 | 1 | chaperone mediated protein folding requiring cofactor           |
| GO:0051259 | 1 | protein oligomerization                                         |
| GO:0060274 | 1 | maintenance of stationary phase                                 |
| GO:0071932 | 1 | replication fork reversal                                       |
| GO:0009073 | 2 | aromatic amino acid family biosynthetic process                 |
| GO:0009252 | 2 | peptidoglycan biosynthetic process                              |
| GO:0000271 | 1 | polysaccharide biosynthetic process                             |
| GO:0000725 | 1 | recombinational repair                                          |
| GO:0006259 | 1 | DNA metabolic process                                           |
| GO:0006269 | 1 | DNA replication, synthesis of RNA primer                        |
| GO:0008156 | 1 | negative regulation of DNA replication                          |
| GO:0015684 | 1 | ferrous iron transport                                          |
| GO:0015920 | 1 | lipopolysaccharide transport                                    |
| GO:0019740 | 1 | nitrogen utilization                                            |
| GO:0032297 | 1 | negative regulation of DNA-dependent DNA replication initiation |
| GO:0044237 | 1 | cellular metabolic process                                      |
| GO:0050821 | 1 | protein stabilization                                           |
| GO:0051205 | 1 | protein insertion into membrane                                 |
| GO:0070417 | 1 | cellular response to cold                                       |
| GO:0097171 | 1 | ADP-L-glycero-beta-D-manno-heptose biosynthetic process         |
| GO:0008360 | 2 | regulation of cell shape                                        |

|            |   |                                                                      |
|------------|---|----------------------------------------------------------------------|
| GO:0042710 | 2 | biofilm formation                                                    |
| GO:0015031 | 2 | protein transport                                                    |
| GO:0001123 | 1 | transcription initiation from bacterial-type RNA polymerase promoter |
| GO:0006261 | 1 | DNA-dependent DNA replication                                        |
| GO:0006807 | 1 | nitrogen compound metabolic process                                  |
| GO:0009117 | 1 | nucleotide metabolic process                                         |
| GO:0017038 | 1 | protein import                                                       |
| GO:0044781 | 1 | bacterial-type flagellum organization                                |
| GO:0071973 | 2 | bacterial-type flagellum-dependent cell motility                     |
| GO:0006352 | 1 | DNA-templated transcription, initiation                              |
| GO:0008615 | 1 | pyridoxine biosynthetic process                                      |
| GO:0006631 | 1 | fatty acid metabolic process                                         |
| GO:0010468 | 1 | regulation of gene expression                                        |
| GO:0006396 | 1 | RNA processing                                                       |
| GO:0006928 | 1 | movement of cell or subcellular component                            |
| GO:0045454 | 1 | cell redox homeostasis                                               |
| GO:0009423 | 1 | chorismate biosynthetic process                                      |
| GO:0006629 | 1 | lipid metabolic process                                              |
| GO:0009244 | 1 | lipopolysaccharide core region biosynthetic process                  |
| GO:0008033 | 1 | tRNA processing                                                      |
| GO:0006508 | 1 | proteolysis                                                          |
| GO:0006310 | 1 | DNA recombination                                                    |
| GO:0006412 | 1 | translation                                                          |
| GO:0009408 | 1 | response to heat                                                     |
| GO:0008652 | 2 | cellular amino acid biosynthetic process                             |
| GO:0046677 | 1 | response to antibiotic                                               |
| GO:0016310 | 2 | phosphorylation                                                      |
| GO:0006281 | 1 | DNA repair                                                           |
| GO:0009103 | 1 | lipopolysaccharide biosynthetic process                              |
| GO:0006974 | 3 | cellular response to DNA damage stimulus                             |
| GO:0005975 | 1 | carbohydrate metabolic process                                       |
| GO:0008152 | 3 | metabolic process                                                    |
| GO:0055114 | 4 | oxidation-reduction process                                          |
| GO:0006355 | 2 | regulation of transcription, DNA-templated                           |
| GO:0006810 | 4 | transport                                                            |
| GO:0006351 | 1 | transcription, DNA-templated                                         |

165 **Table S2. Clusters of Orthologous Groups (COGs) for GRABS hits, related to**

166 **Figure 2 and Figure 3.**

| COG code | Counts | Definition                                                    |
|----------|--------|---------------------------------------------------------------|
| A        | 1      | RNA processing and modification                               |
| C        | 8      | Energy production and conversion                              |
| E        | 4      | Amino acid transport and metabolism                           |
| F        | 2      | Nucleotide transport and metabolism                           |
| G        | 1      | Carbohydrate transport and metabolism                         |
| H        | 1      | Coenzyme transport and metabolism                             |
| J        | 1      | Translation, ribosomal structure, and biogenesis              |
| K        | 2      | Transcription                                                 |
| L        | 6      | Replication, recombination, and repair                        |
| M        | 9      | Cell wall, membrane, and envelope biogenesis                  |
| N        | 3      | Cell motility                                                 |
| O        | 3      | Posttranslational modification and metabolism                 |
| P        | 1      | Inorganic ion transport and metabolism                        |
| R        | 1      | General function prediction only                              |
| S        | 3      | Function unknown                                              |
| T        | 3      | Signal transduction mechanisms                                |
| U        | 3      | Intracellular trafficking, secretion, and vesicular transport |
| V        | 1      | Cytoskeleton                                                  |

167

168 **Table S3: Chemical-genomics conditions with the largest-magnitude positive**

169 **Pearson correlation coefficients with stiffness scores. Related to Figure 5.**

170 GRABS scores were correlated with S-scores from the chemical genomics dataset

171 in (Nichols et al., 2011). SDS, sodium dodecyl sulfate.

| Condition                  | Correlation coefficient |
|----------------------------|-------------------------|
| Chlorpromazine, 12.0 µg/mL | 0.092                   |
| Calcofluor                 | 0.079                   |
| Chlorpromazine, 3.0 µg/mL  | 0.079                   |
| Ceftazidime, 0.05 µg/mL    | 0.078                   |
| Cefsulodin, 12.0 µg/mL     | 0.076                   |
| SDS, 3.0%                  | 0.075                   |
| Cefsulodin, 6.0 µg/mL      | 0.075                   |
| Cefoxitin, 1.0 µg/mL       | 0.07                    |
| Chlorpromazine, 6.0 µg/mL  | 0.07                    |
| Trimethoprim, 0.4 µg/mL    | 0.068                   |
| Dibucaine, 0.8 µg/mL       | 0.068                   |
| Cefaclor, 2.0 µg/mL        | 0.068                   |
| Nigericin, 0.1 µg/mL       | 0.065                   |
| Ampicillin, 8.0 µg/mL      | 0.065                   |
| SDS, 2.0%                  | 0.064                   |
| Doxorubicin, 1.0 µg/mL     | 0.063                   |
| Bacitracin, 300 µg/mL      | 0.063                   |
| Ultraviolet light, 18 s    | 0.061                   |
| Cefoxitin, 0.75 µg/mL      | 0.059                   |
| pH 4                       | 0.059                   |

172

173 **Table S4: Chemical-genomics conditions with the largest-magnitude negative**

174 **Pearson correlation coefficients with stiffness scores. Related to Figure 5.**

175 GRABS scores were correlated with S-scores from the chemical genomics dataset

176 in (Nichols et al., 2011). MMS, methyl methanesulfonate; CCCP, carbonyl

177 cyanide *m*-chlorophenyl hydrazone.

| Condition                 | Correlation coefficient |
|---------------------------|-------------------------|
| Amoxicillin, 0.5 µg/mL    | -0.081                  |
| Amoxicillin, 0.25 µg/mL   | -0.069                  |
| Thiolactomycin, 5.0 µg/mL | -0.062                  |
| MMS, 0.05%                | -0.060                  |
| Tetracycline, 1.0 µg/mL   | -0.057                  |
| Gentamycin, 0.1 µg/mL     | -0.056                  |
| Tetracycline, 0.75 µg/mL  | -0.056                  |
| Thiolactomycin, 1.0 µg/mL | -0.053                  |
| CCCP, 0.5 µg/mL           | -0.053                  |
| CHIR-090, 0.02 µg/mL      | -0.053                  |
| Nitrofurantoin, 0.5 µg/mL | -0.052                  |
| Oxacillin, 5.0 µg/mL      | -0.051                  |
| Theophylline, 100.0 µg/mL | -0.051                  |
| Oxacillin, 0.5 µg/mL      | -0.050                  |
| High nickel, 0.1 µg/mL    | -0.050                  |
| Norfloxacin, 0.01 µg/mL   | -0.049                  |
| Nitrofurantoin, 1.0 µg/mL | -0.048                  |
| CCCP, 2.0 µg/mL           | -0.046                  |
| CCCP, 0.1 µg/mL           | -0.046                  |
| High nickel, 1.0 µg/mL    | -0.046                  |

178

179 **Table S5: Liquid growth-curve data for Keio strains in the absence of**  
180 **kanamycin. Related to Figure 2.** Optical density ( $\lambda = 595$  nm) was measured as a  
181 function of time. Growth data are included as a separate text file.

**Table S6: Strains and plasmids used in this study. Related to Figures 1–5.**

| Strain                        | Description                                                                                                                                                                       | Reference/source                 |
|-------------------------------|-----------------------------------------------------------------------------------------------------------------------------------------------------------------------------------|----------------------------------|
| MG1655                        | <i>E. coli</i> K-12 wildtype                                                                                                                                                      | CGSC #6300                       |
| BW25113                       | <i>E. coli</i> (Keio collection parent)                                                                                                                                           | (Baba <i>et al.</i> , 2006a)     |
| Keio collection               | Single deletion mutants (numbered JW####)                                                                                                                                         | (Baba <i>et al.</i> , 2006a)     |
| DH5 $\alpha$                  | F- <i>endA1 glnV44 thi-1 recA1 relA1 gyrA96 deoR nupG</i> $\Phi$ 80 <i>dlacZ</i> $\Delta$ M15 $\Delta$ ( <i>lacZYA-argF</i> )U169, <i>hsdR17</i> (rK-mK+)                         | Invitrogen                       |
| DH5 $\alpha$ ( $\lambda$ pir) | F- <i>endA1 glnV44 thi-1 recA1 relA1 gyrA96 deoR nupG</i> $\Phi$ 80 <i>dlacZ</i> $\Delta$ M15 $\Delta$ ( <i>lacZYA-argF</i> )U169, <i>hsdR17</i> (rK-mK+) $\lambda$ ::pir         | Invitrogen                       |
| MFDpir                        | MG1655, RP4-2-Tc::[ $\Delta$ Mu1:: <i>aac</i> (3)IV- <i>aphA</i> $\Delta$ <i>nic35</i> $\Delta$ Mu2:: <i>zeo</i> ] $\Delta$ <i>dapA</i> ::( <i>erm</i> -pir) $\Delta$ <i>recA</i> | (Ferrieres <i>et al.</i> , 2010) |
| HTC1                          | MG1655 $\Delta$ <i>mrcB</i>                                                                                                                                                       | This study                       |
| HTC2                          | MG1655 $\Delta$ <i>lpoB</i>                                                                                                                                                       | This study                       |
| HTC3                          | MG1655 $\Delta$ <i>mrcA</i>                                                                                                                                                       | This study                       |
| HTC4                          | MG1655 $\Delta$ <i>lpoA</i>                                                                                                                                                       | This study                       |
| HTC5                          | MG1655 $\Delta$ <i>hscA</i>                                                                                                                                                       | This study                       |
| HTC6                          | MG1655 $\Delta$ <i>hfq</i>                                                                                                                                                        | This study                       |
| BW25113-E1                    | BW25113 pBAD33 <i>c280</i>                                                                                                                                                        | This study                       |
| JW3359-E1                     | BW25113 <i>mrcA</i> : kan pBAD33 <i>c280</i>                                                                                                                                      | This study                       |
| JW3116-E1                     | BW25113 <i>lpoA</i> : kan pBAD33 <i>c280</i>                                                                                                                                      | This study                       |
| JW5157-E1                     | BW25113 <i>lpoB</i> : kan pBAD33 <i>c280</i>                                                                                                                                      | This study                       |
| JW2510-E1                     | BW25113 <i>hscA</i> : kan pBAD33 <i>c280</i>                                                                                                                                      | This study                       |
| JW4130-E1                     | BW25113 <i>hfq</i> : kan pBAD33 <i>c280</i>                                                                                                                                       | This study                       |
| JW3359-C                      | BW25113 <i>mrcA</i> : kan pBAD33 <i>c280</i> - <i>mrcA</i>                                                                                                                        | This study                       |
| JW3116-C                      | BW25113 <i>lpoA</i> : kan pBAD33 <i>c280</i> - <i>lpoA</i>                                                                                                                        | This study                       |
| JW5157-C                      | BW25113 <i>lpoB</i> : kan pBAD33 <i>c280</i> - <i>lpoB</i>                                                                                                                        | This study                       |
| JW2510-C                      | BW25113 <i>hscA</i> : kan pBAD33 <i>c280</i> -                                                                                                                                    | This study                       |

|              | <i>hscA</i>                                                  |            |
|--------------|--------------------------------------------------------------|------------|
| JW4130-C     | BW25113 <i>hfq</i> : kan pBAD33c280- <i>hfq</i>              | This study |
| BW25113-E2   | BW25113 pAM238                                               | This study |
| JW0145-E2    | BW25113 <i>mrcB</i> : kan pAM238                             | This study |
| JW5157-E2    | BW25113 <i>lpoB</i> : kan pAM238                             | This study |
| JW1045-C     | JW0145 psK12                                                 | This study |
| HTC7         | JW0145 psK12-R190D                                           | This study |
| HTC8         | JW0145 psK12-D163A/E166A                                     | This study |
| HTC9         | JW0145 psK12-E233Q (*GT)                                     | This study |
| HTC10        | JW0145 psK12-S510A (*TP)                                     | This study |
| HTC11        | JW0145 psK12-D163A/E166A/E187A/<br>N188A/R190A/Q191A (6UB2H) | This study |
| HTC12        | JW0145 psK12-(*TP/*GT)                                       | This study |
| HTC13        | JW0145 psK12-(*6UB2H/*TP)                                    | This study |
| HTC14        | JW0145 psK12-(*6UB2H/*GT)                                    | This study |
| HTC15        | JW0145 psK12-(*6UB2H/*TP/*GT)                                | This study |
| BW25113-sulA | BW25113 pDB192                                               | This study |
| JW3359-sulA  | BW25113 <i>mrcA</i> : kan pDB192                             | This study |
| JW3116-sulA  | BW25113 <i>lpoA</i> : kan pDB192                             | This study |
| JW1045-sulA  | BW25113 <i>mrcB</i> : kan pDB192                             | This study |
| JW5157-sulA  | BW25113 <i>lpoB</i> : kan pDB192                             | This study |
| JW2510-sulA  | BW25113 <i>hscA</i> : kan pDB192                             | This study |
| JW4130-sulA  | BW25113 <i>hfq</i> : kan pDB192                              | This study |
| JW4216-sulA  | BW25113 <i>holC</i> : kan pDB192                             | This study |
| JW2512-sulA  | BW25113 <i>iscA</i> : kan pDB192                             | This study |
| JW2050-sulA  | BW25113 <i>dcd</i> : kan pDB192                              | This study |
| JW1075-sulA  | BW25113 <i>rpmF</i> : kan pDB192                             | This study |
| JW1065-sulA  | BW25113 <i>flgG</i> : kan pDB192                             | This study |
| JW0891-sulA  | BW25113 <i>aroA</i> : kan pDB192                             | This study |
| JW2669-sulA  | BW25113 <i>recA</i> : kan pDB192                             | This study |
| BW25113-E3   | BW25113 PUA66                                                | This study |
| JW1045-E3    | BW25113 <i>mrcB</i> : frt pUA66                              | This study |
| JW5157-E3    | BW25113 <i>lpoB</i> : frt pUA66                              | This study |
| JW2510-E3    | BW25113 <i>hscA</i> : frt pUA66                              | This study |
| JW4130-E3    | BW25113 <i>hfq</i> : frt pUA66                               | This study |



| JW2512-E3               | BW25113 <i>iscA</i> : frt pUA66                    | This study                      |
|-------------------------|----------------------------------------------------|---------------------------------|
| JW2669-E3               | BW25113 <i>recA</i> : frt pUA66                    | This study                      |
| BW25113- <i>sulA</i> -R | BW25113 PUA66- <i>sulA</i> -GFP                    | This study                      |
| JW1045- <i>sulA</i> -R  | BW25113 <i>mrcB</i> : frt pUA66- <i>sulA</i> -GFP  | This study                      |
| JW5157- <i>sulA</i> -R  | BW25113 <i>lpoB</i> : frt pUA66- <i>sulA</i> -GFP  | This study                      |
| JW2510- <i>sulA</i> -R  | BW25113 <i>hscA</i> : frt pUA66- <i>sulA</i> -GFP  | This study                      |
| JW4130- <i>sulA</i> -R  | BW25113 <i>hfq</i> : frt pUA66- <i>sulA</i> -GFP   | This study                      |
| JW2512- <i>sulA</i> -R  | BW25113 <i>iscA</i> : frt pUA66- <i>sulA</i> -GFP  | This study                      |
| JW2669- <i>sulA</i> -R  | BW25113 <i>recA</i> : frt pUA66- <i>sulA</i> -GFP  | This study                      |
| Plasmid                 | Description                                        | Reference/source                |
| pDS132                  | R6K ori, <i>sacB</i> , MCS, <i>cat</i> , CmR       | (Phillipe <i>et al.</i> , 2004) |
| pBAD33 c280             | pACYC ori, pBAD promoter, MCS, <i>cat</i> , CmR    | (Lee <i>et al.</i> , 2007)      |
| pAM238                  | pSC101 ori, pLac, SpecR                            | (Gonzalez <i>et al.</i> , 2010) |
| pSK12                   | pAM238- <i>mrcB</i>                                | (Ranjit and Young, 2013)        |
| pDB195                  | <i>sulA</i> , pLac, AmpR, CarbR                    | (Amir <i>et al.</i> , 2014)     |
| pUA66                   | <i>gfpmut2</i> , KanR                              | GE Dharmacon                    |
| pUA66- <i>sulA</i> -GFP | <i>sulA</i> promoter, <i>sulA</i> - <i>gfpmut2</i> | GE Dharmacon                    |

184 **Table S7. Primers used in this study (5' to 3'). Related to Figure 4.**

| Primer (pBAD33 c280) | Sequence                                       |
|----------------------|------------------------------------------------|
| mrcA_C-Fwd           | CATGTCTAGATTACGCCAGACGCGGGTTAA                 |
| mrcA_C-Rev           | CATGTCTAGAGTGAAGTTCGTAAAGTATTTTT               |
| lpoA_C-Fwd           | CATGTCTAGAATGGTACCCTCAACATTTTCTCG              |
| lpoA_C-Rev           | CATGTCTAGATTAAGTACGCGGGACTACCTGA               |
| lpoB_C-Fwd           | CATGTCTAGAATGACAAAAATGAGTCGCTAC<br>GC          |
| lpoB_C-Rev           | CATGTCTAGATTATTGCTGCGAAACGGCACCT               |
| hscA_C-Fwd           | CATGTCTAGAATGGCCTTATTACAAATTAGTG<br>AACCT      |
| hscA_C-Rev           | CATGTCTAGATTAAACCTCGTCCACGGAATG                |
| hfg_C-Fwd            | CATGTCTAGAATGGCTAAGGGGCAATCTTTAC<br>A          |
| hfg_C-Rev            | CATGTCTAGATTATTCGGTTTCTTCGCTGTCCT              |
| Primer (pSK12)       | Sequence                                       |
| mrcB_R190D_Fwd       | CGTCAATATGGAGAACAACGATCAGTTCGGTT<br>TCTTCCG    |
| mrcB_R190D_Rev       | CGGAAGAAACCGAACTGATCGTTGTTCTCCAT<br>ATTGACG    |
| mrcB_D163A/E166A_Fwd | CCGTTTGATTTCCCGGCCAGTAAAGCAGGACA<br>GGTGCGCGCG |
| mrcB_D163A/E166A_Rev | CGCGCGCACCTGTCCTGCTTTACTGGCCGGGA<br>AATCAAACGG |
| mrcB_R190A/Q191A_Fwd | CGTCAATATGGCGGCCAACGCTGCGTTCGGTT<br>TCTTCCG    |
| mrcB_R190A/Q191A_Rev | CGGAAGAAACCGAACGCAGCGTTGGCCGCCA<br>TATTGACG    |
| mrcB_E187A/N188A_Fwd | CGTCAATATGGCGGCCAACGTCAGTTCGGTT<br>TCTTCCG     |
| mrcB_E187A/N188A_Rev | CGGAAGAAACCGAACTGACGGTTGGCCGCCA<br>TATTGACG    |
| mrcB_S510A_Fwd       | GCGTCGTTTCGATTGGTGCCCTTGCAAAACCAG<br>CG        |
| mrcB_S510A_Rev       | CGCTGGTTTTGCAAGGGCACCAATCGAACGAC<br>GC         |
| mrcB_E233Q_Fwd       | GGATACTTTGCTGGCGACACAAGACCGTCATT<br>TTTACG     |

|                     |                                                                     |
|---------------------|---------------------------------------------------------------------|
| mrcB_E233Q_Rev      | CGTAAAAATGACGGTCTTGTGTCGCCAGCAAA<br>GTATCC                          |
| Primer (pDS132)     | Sequence                                                            |
| lpoA_Del_N_term_Fwd | GCATGCAGCGCATCACGGCGGCCT                                            |
| lpoA_Del_N_term_Rev | TGGTACTCTAGCCATAATGTATCCAGTGATAT<br>TTTTTTTACGCAATGCTCAATATTAATCGGC |
| lpoA_Del_C_term_Fwd | ATCACTGGATACATTATGGCTACAGTACCAAC<br>AAG                             |
| lpoA_Del_C_term_Rev | ATTGAGCAGAGACTGAAC                                                  |
| lpoB_Del_N_term_Fwd | TTGCCGAAGATGGCTATC                                                  |
| lpoB_Del_N_term_Rev | GCTGCGAAACGGCACCAAGATTCACCCCTTAC<br>AAATATAG                        |
| lpoB_Del_C_term_Fwd | AAGGGGTGAATCTTGGTGCCGTTTCGCAGCAA<br>T                               |
| lpoB_Del_C_term_Rev | CTGACGCGCTATGCACTAAATTTC                                            |
| mrcA_Del_N_term_Fwd | AGTAAGCAGCGTTGCCAG                                                  |
| mrcA_Del_N_term_Rev | GAAGCGCCT<br>TTTAAATGGAAATTTCCATTTAGTTTCATTG                        |
| mrcA_Del_C_term_Fwd | AATGGGAAATTTCCATTA AAAAGGCGCTTCGG<br>C                              |
| mrcA_Del_C_term_Rev | ATCCTGATCCGCGAATAC                                                  |
| mrcB_Del_N_term_Fwd | AAATCACTCGACATTTATCAGG                                              |
| mrcB_Del_N_term_Rev | TTTCACGCTTAGATGGCTTTTTCTCCGCAATAT<br>TC                             |
| mrcB_Del_C_term_Fwd | TTGCGGAGAAAAGCCATCTAAGCGTGAAAT<br>ACCG                              |
| mrcB_Del_C_term_Rev | TCAGGTGGTCATAGGTGTTG                                                |
| hscA_Del_N_term_Fwd | ATGGATTACTTCACCCTC                                                  |
| hscA_Del_N_term_Rev | ACAATCTTTGGCATAGTTTAGCTTCCAGAAAT<br>TAAAAATC                        |
| hscA_Del_C_term_Fwd | TTCTGGAAGCTAAACTATGCCAAAGATTGTTA<br>TTTTGCCTCATCAGG                 |
| hscA_Del_C_term_Rev | GCCAACGCATCTGCGGCG                                                  |
| hfq_Del_N_term_Fwd  | CTTCAGGAGGTAGATCCG                                                  |
| hfq_Del_N_term_Rev  | AAACAGCCCGAAACCTCTCTTTTCCTTATAT<br>GCTTATTTG                        |
| hfq_Del_C_term_Fwd  | TAAGGAAAAGAGAGAGGTTTCGGGCTGTTTTT<br>TTAC                            |
| hfq_Del_C_term_Rev  | CATGCGTACGCCTTTCTGTCTTTCAAGGTG                                      |



## 186 EXTENDED EXPERIMENTAL PROCEDURES

187

### 188 **Strain and plasmid construction**

189 Table S6 lists the strains and plasmids used in this study for cloning. Primers are  
190 described in Table S7. Screening was performed using the Keio collection of non-  
191 essential single-gene deletion mutants (Baba et al., 2006). We used allele  
192 exchange to individually delete genes in frame in *E. coli* MG1655 without leaving  
193 a scar on the chromosome after excision (Philippe et al., 2004).

194

### 195 **Growth of bacterial cultures for screening**

196 Individual 2-mL cultures were inoculated from a freezer stock and grown  
197 overnight in lysogeny broth (LB) at 37 °C with shaking until saturation (~16 h).  
198 For this initial overnight culture, Keio mutants were grown in the presence of 30  
199 µg/mL kanamycin for selection of the Keio mutant. Strains containing plasmid  
200 pBAD33 c280 or plasmid pAM238/pSK12 were grown overnight in 30 µg/mL  
201 chloramphenicol or 30 µg/mL spectinomycin, respectively.

202

### 203 **Preparation of GRABS 96-well plates**

204 The absorbance values ( $\lambda = 600$  nm) of 1:10 dilutions in LB of saturated overnight  
205 cultures of 48 strains grown in tubes were determined using a spectrophotometer

206 (Amersham Biosciences, Buckinghamshire, UK). Cells were spun down at 800 x g  
207 for 10 min, the supernatants were removed, and the pellets were resuspended in  
208 1 mL LB to a final density of 0.32 × optical density (OD). To prepare for agarose  
209 encapsulation, 48 microstirrers (V&P Scientific, San Diego, CA, USA) were  
210 sterilized with 70% ethanol and placed into individual wells in columns 1-6 of a  
211 96-well microplate (Thermo Scientific Nunc, Waltham, MA, USA). The  
212 microplate was covered with a lid and sterilized with ultraviolet light for 20 min.  
213 After sterilization, the microplate was placed onto our custom magnetic surface  
214 composed of two magnets (BZ0Z02-N52; KJ Magnetics, Pipersville, PA, USA)  
215 mounted in plastic casing, and a new sterile microplate was inverted on top. The  
216 two plates were turned over and placed onto the magnetic surface to draw the  
217 microstirrers into the new sterile plate. Finally, a sterile lid was placed onto the  
218 new microplate, which was transferred to a 50 °C hotplate to warm the plate and  
219 magnets for at least 20 min prior to the addition of agarose. This warming step  
220 ensured that the agarose remained in solution after being added to the plate.

221

222 Agarose was prepared as a solution of 1% w/v UltraPure agarose (Invitrogen  
223 Corporation, Carlsbad, CA, USA) in 20 mL LB. The solution was heated in a  
224 microwave until the agarose dissolved completely and the solution was visually  
225 homogeneous. The hot agarose solution was placed in a 65 °C water bath for 30 s

226 while air bubbles rose to the surface. To prepare the final plate for growth-curve  
227 measurements, we maintained the microplate at 50 °C and pipetted 150 µL LB  
228 into the wells in columns 7-12 (these wells lacked magnets) and let the LB warm  
229 for >20 min. Using a positive displacement pipette (Eppendorf, Hamburg,  
230 Germany), we added 150 µL of agarose prepolymer from a 2.5-mL tip into each  
231 well that contained a magnetic stirrer. Antibiotics were added as necessary and  
232 the cultures were mixed with magnetic stirrers for ~10 s. The microplate was  
233 transferred to a second hotplate set to 37 °C and cooled for 15-20 s. We aliquoted  
234 5 µL of each cell suspension using a multichannel pipette into one well with LB  
235 and one well with agarose prepolymer to yield an OD ~0.01 and mixed the  
236 resulting cultures with magnetic stirrers for ~10 s.

237

238 We then took the microplate off the hotplate, removed the microplate lid, and  
239 rapidly applied the magnetic lid to extract the stirrers out of the wells. We  
240 removed the magnetic lid and quickly popped any bubbles on the surface of the  
241 agarose gel with a sterile pipette tip to ensure that the gel surface was smooth to  
242 enable accurate absorbance readings. The lid was again placed on the microplate,  
243 which was incubated at room temperature for 5 min while the agarose solidified.  
244 The lid was removed and the plate was sealed with a transparent polymer film  
245 (Excel Scientific, Victorville, CA, USA). To reduce condensation on the film, we

246 made ~0.25-0.5 cm cuts with a razor blade sterilized with 70% ethanol on  
247 opposite sides of each well near its edge. Finally, we placed the microplate into a  
248 preheated 37 °C M1000 plate reader (Tecan, Mannedorf, Switzerland) and  
249 acquired growth curves at 37 °C by measuring absorbance at 595 nm. The orbital  
250 and linear shaking durations were 30 s and 15 s, respectively, and the shaking  
251 amplitude was 2 mm. Readings were taken for 16 h at 1-min intervals. The Tecan  
252 M1000 plate reader was driven using i-control v. 1.9.17.0 (Tecan), which was  
253 used to collect and export data for further analysis.

254

#### 255 **GRABS measurements in variable agarose concentrations**

256 *E. coli* BW25113 was inoculated from a freezer stock into 2 mL LB and grown  
257 overnight at 37 °C in a shaking incubator. We measured the absorbance ( $\lambda = 600$   
258 nm) of a 1:10 dilution in LB of the overnight culture and calculated the volume of  
259 culture needed for resuspension in 1 mL of fresh medium for a final absorbance  
260 of 2. This volume of cells was spun down at 800 x *g* for 10 min, the supernatant  
261 was removed, and the pellet was resuspended in 1 mL LB. The cells were stored  
262 at 37 °C until use (within 5 min).

263

264 A stock solution of 5% (w/v) agarose was prepared by dissolving UltraPure  
265 agarose into 65 mL LB and placing the solution in a 70 °C water bath. Twenty-



266 milliliter working solutions of 0.25-5% (w/v) agarose were prepared in 50-mL  
267 conical tubes by diluting the appropriate volume of 5% (w/v) agarose in  
268 preheated LB. These solutions were also placed into the 70 °C water bath. Using  
269 a positive displacement pipette, 2 mL of the agarose working solutions were  
270 aliquoted into individual preheated glass test tubes and kept at 65 °C in a water  
271 bath. Individual tubes were subsequently removed from the 70 °C water bath  
272 and allowed to cool in a 37 °C water bath for ~20 s. Ten microliters of the cell  
273 suspension were added to each test tube, yielding a final cell density in solution  
274 of 0.01 ( $\lambda = 600$  nm), and the tube was vigorously shaken to ensure homogenous  
275 incorporation of the cells into the agarose solution. Using a positive displacement  
276 pipette, 150  $\mu$ L of the agarose cell solution were pipetted into a 96-well  
277 microplate in replicate ( $n \geq 3$ ). This process was repeated for each agarose  
278 concentration. We also monitored growth in liquid LB in order to determine the  
279 percent inhibition of each gel compared to liquid. The liquid control was  
280 prepared at room temperature with the same cell suspension used for the  
281 agarose growth curves. The plate was placed on the bench at room temperature  
282 for ~3 min in order to allow the agarose wells to solidify. Growth was monitored  
283 with a plate reader.

284

285 **GRABS data analysis**

286 Growth data were collected over 16 h for Keio mutants in both agarose and  
287 liquid medium. To reduce the growth curve to a scalar value, we first normalized  
288 the growth data in liquid and agarose by subtracting the minimum OD reading  
289 (in agarose and liquid) for each mutant. Next, we averaged the 10 min of growth  
290 before the 8 h time point, which is approximately when BW25113 cells begin to  
291 enter stationary phase in liquid medium (Figure S3A-C). Cells tend to reach  
292 saturation at later time points when embedded in agarose (Figure S3A-C), and  
293 thus our mechanical phenotype is sensitive to the time point of measurement;  $t =$   
294 8 h was selected because it provided the largest dynamic range of values (Figure  
295 S3A-C). We then determined a percent growth value for each mutant compared  
296 to wildtype. The GRABS score is a relative percentage of wild-type OD,  
297 calculated as  $((OD_{\text{mutant,agarose}}/OD_{\text{WT,agarose}}) - (OD_{\text{mutant,liquid}}/OD_{\text{WT,liquid}}))$ . A positive  
298 growth value indicates an increase in GRABS score, and a negative growth score  
299 indicates a decrease in GRABS score. Note that this GRABS score is a measure of  
300 cell mechanics that is complementary, but not identical, to the Young's modulus.  
301 For our screen in kanamycin, we normalized all mutant data to an average of  
302 several wild-type growth curves in liquid and agarose. In our secondary screen  
303 in LB, we used the wild-type control on each plate to normalize the data.

304

305 **Analysis of cell morphology**

306 To estimate the average cell morphology across the Keio collection, images from  
307 the National BioResource Project were segmented with a custom MATLAB  
308 software package (Ursell et al., 2014). At least 100 cells were included in the  
309 calculation of average cell width and length for each Keio mutant.

310

### 311 **Correlation with chemical-genomics data**

312 To compare GRABS scores against colony growth data from a variety of chemical  
313 conditions, we calculated the Pearson correlation coefficient between the GRABS  
314 scores for all tested mutants and the S-scores for the equivalent mutants in the  
315 chemical condition from Ref. (Nichols et al., 2011). The significance of the  
316 correlation for each condition was estimated by comparing the correlation score  
317 against the correlation of 1000 random permutations of S-scores.

318

### 319 **Complementation and deletion assays for GRABS hits and PBP1b mutants**

320 Keio-complementation and wild-type control strains were streaked out from  
321 freezer stock onto LB agar plates with appropriate antibiotics to obtain  
322 individual colonies. Individual colonies were inoculated into 2 mL LB with  
323 appropriate antibiotics and grown overnight at 37 °C. Saturated overnight  
324 cultures were diluted 1:100 into 2 mL fresh LB (without antibiotics) and grown to  
325 an absorbance of ~0.6 ( $\lambda = 600$  nm). Microplates were prepared as described

326 above. For complementation assays, antibiotics were not added to microplate  
327 wells so as to not influence the growth of the cells. Five microliters of a 2.5 mM  
328 arabinose stock solution were added to the wells containing strains with plasmid  
329 pBAD33 c280; the final arabinose gel concentration was 0.08 mM. Strains with  
330 wildtype or mutant PBP1b under the control of isopropyl  $\beta$ -D-1-  
331 thiogalactopyranoside were not induced; the basal level of expression from the  
332 *lac* operon was sufficient for full complementation of the stiffness defect (Figure  
333 S4A). Growth curves were compared to curves for the appropriate empty  
334 vector/native PBP1b controls to confirm recovery or loss of cell stiffness when the  
335 proteins were expressed in *trans*.

336

337 *E. coli* MG1655 mutants ( $\Delta mrcB$ ,  $\Delta mrcA$ ,  $\Delta lpoB$ ,  $\Delta lpoA$ ,  $\Delta hscA$ , and  $\Delta hfq$ ) were  
338 streaked out from freezer stocks onto LB agar plates to obtain individual  
339 colonies. Individual colonies were inoculated into 2 mL LB and grown overnight  
340 at 37 °C. Wild-type and mutant strains were screened for stiffness changes as  
341 described above and compared to the corresponding BW25113 mutants.

342

### 343 **Confirmation of chemical effectors of GRABS measurements**

344 *E. coli* BW25113 and 45 additional Keio strains were grown overnight from  
345 freezer stock until saturation, in the appropriate antibiotic. Carbonyl cyanide *m*-

346 chlorophenyl hydrazone (CCCP, Sigma-Aldrich) stock was prepared by  
347 dissolving CCCP into dimethyl sulfoxide (DMSO) (Sigma-Aldrich, St. Louis, MO,  
348 USA). CCCP was diluted into 1 mL LB to yield a 64 µg/mL working solution. The  
349 GRABS plate and cells were prepared as described above. During preparation of  
350 the GRABS plate, 5 µL CCCP were added to each well. The final concentrations  
351 of CCCP and DMSO in the plate were 2 µg/mL and ~0.1%, respectively.  
352 Appropriate DMSO-only controls were performed to confirm that DMSO did not  
353 affect the GRABS score. The percent growth values were determined as  
354 described, using the BW25113 (DMSO+) and (CCCP+) wells to normalize data  
355 from the mutants.

356

### 357 **Microscopy-based stiffness measurements**

358 Single-cell measurements of encapsulated cell growth were performed in 1-4%  
359 (w/v) agarose as described previously (Tuson et al., 2012). Briefly, bacteria were  
360 grown in liquid LB without antibiotics to an absorbance ( $\lambda = 600$  nm) of ~0.6. Cells  
361 were diluted 1:100 and spotted onto 2% agarose pads. Elongation was monitored  
362 on a Nikon Eclipse Ti inverted microscope (Nikon, Tokyo, Japan) equipped with  
363 a heated stage (Okolab, Pozzuoli, Italy) and objective heater (Bioprotechs, Butler,  
364 PA, USA) at 37 °C. Images were collected over a 30-min period at 1-min intervals  
365 using a CoolSNAP HQ2 camera (Photometrics, Munich, Germany). Cell length

366 was measured for each mutant and wild-type strain using MicrobeTracker  
367 (Sliusarenko et al., 2011). Length measurements were halted after cells divided.  
368 We calculated the fractional elongation over time for each mutant, averaged over  
369 all single cells (Tuson et al., 2012).

370

### 371 **Microfluidic-based stiffness measurements**

372 Keio mutants and wild-type strains were transformed with a plasmid (pDB192)  
373 containing *sulA* under an isopropyl  $\beta$ -D-1-thiogalactopyranoside-inducible  
374 promoter. The strains were grown overnight in 2 mL LB containing 30  $\mu$ g/mL  
375 kanamycin and 50  $\mu$ g/mL ampicillin. We fabricated and applied a microfluidic  
376 device to the determination of cellular bending rigidity and Young's modulus as  
377 described previously (Amir et al., 2014). As an alternative means of causing cells  
378 to filament, we applied 1  $\mu$ g/mL aztreonam (MP Biomedicals, CA, USA).

379 Deflection of cells under fluid flow was monitored on a Zeiss Axiovert 100  
380 microscope (Zeiss, Oberkochen, Germany) equipped with a 60X oil objective.

381 Images were collected with an Andor iXon 3 EMCCD (Andor, Belfast, UK) using  
382  $\mu$ Manager v. 1.4.16 (Edelstein et al., 2010). Deflection of the cells was determined  
383 using a custom Igor Pro (WaveMetrics Inc.) image analysis algorithm.

384

385 To account for changes in the diameter of mutant cells compared to wild-type  
386 cells after filamentation, we collected static images on a Nikon Eclipse Ti  
387 inverted microscope equipped with a 60X oil objective (Nikon) using a  
388 CoolSNAP HQ2 camera (Photometrics). Cell width was measured using  
389 MicrobeTracker (Sliusarenko et al., 2011). These measurements were used to  
390 calculate the Young's modulus from the flexural rigidity, in which the moment of  
391 inertia ( $I$ ) of a cross-section is dependent on cell radius ( $r$ ) and thickness of the  
392 cell wall ( $h$ ) according to  $I = \pi r^3 h$ .

393

#### 394 **Cell death in 1% agarose and liquid**

395 The GRABS assay for Keio mutants and wild-type strains was carried out as  
396 described above. One hundred and fifty microliters of liquid LB and agarose  
397 (prior to gelling) were pipetted out of the 96-well plate and transferred to an 8-  
398 well LAB-TEK II chambered coverglass #1.5 (Nunc, NY, USA). The agarose was  
399 allowed to solidify at room temperature. LAB-TEK II chambers were placed into  
400 a 37 °C incubator with shaking for 8 h, at which point the GRABS score was  
401 determined. After 8 h, cells were removed from the 37 °C incubator and labeled  
402 via the LIVE/DEAD BacLight Viability Kit (L7007, Invitrogen) at room  
403 temperature. For staining of cells grown in liquid, cells were diluted 1:20 in fresh  
404 LB and stained in the dark for 20 min according to the manufacturer's guidelines.

405 For staining of cells grown in agarose, 25  $\mu$ L of a stock solution (100  $\mu$ L  
406 component A (1.67 mM SYTO 9, 1.67 mM Propidium iodide) + 1.5  $\mu$ L component  
407 B (1.67 mM SYTO 9, 18.3 mM Propidium iodide)) were pipetted onto the agarose  
408 surface and allowed to diffuse through the gel in the dark for 30 min. Cells  
409 were imaged with epifluorescence using a Nikon Ti inverted microscope  
410 equipped with a CoolSNAP HQ2 camera (Photometrics) and a 100X oil objective  
411 (Nikon).

412

413 **Purification of sacculi and ultra performance liquid chromatography (UPLC)**  
414 **of peptidoglycan composition**

415 Overnight cultures of *E. coli* BW25113 or Keio strains were diluted 1:100 in LB  
416 and grown at 37 °C to an OD<sub>600</sub> of 0.7. The cultures were then harvested by  
417 centrifugation at 5,000  $\times$  g for 10 min at room temperature and resuspended in 3  
418 mL LB. Cell suspensions were lysed by boiling in sodium dodecyl sulfate, and  
419 insoluble material was collected by several rounds of ultracentrifugation at  
420 400,000  $\times$  g for 20 min at room temperature. Samples were prepared for UPLC as  
421 previously described (Brown et al., 2012) and injected onto a Waters H Class  
422 UPLC system equipped with a BEH C18 1.7- $\mu$ m column (Waters, MA, USA),  
423 using elution conditions previously described (Desmarais et al., 2014). Peaks  
424 were quantified and identified as particular muropeptide species using the



425 software package Chromanalysis (Desmarais et al., 2015), from which the  
426 crosslinking density and strand length were calculated (Ottolenghi et al., 1993;  
427 Pisabarro et al., 1985).

428

#### 429 **Shape of agarose-embedded cells**

430 The GRABS assay for Keio mutants and wild-type strains was carried out as  
431 previously described. One hundred and fifty milliliters of agarose (prior to  
432 gelling) were pipetted out of the 96-well plate and transferred to an 8-well LAB-  
433 TEK II chambered coverglass #1.5 w/cover (Nunc, NY, USA). The agarose was  
434 allowed to solidify at room temperature. LAB-TEK II chambers were placed into  
435 a 37 °C incubator with shaking for 8 h (at which point the GRABS score is  
436 typically determined). After 8 h, cells were removed from the incubator and  
437 labeled with FM 4-64 FX (Invitrogen). For staining, 25 μL of a 100 g/L stock  
438 were pipetted onto the surface of the agarose and allowed to diffuse through the  
439 gel, in the dark, for 30 min. Cells were imaged using phase contrast and  
440 epifluorescence microscopy.

441

#### 442 **Cell density versus OD measured by plate reader**

443 A saturated overnight culture of *E. coli* BW25113 was diluted 1:100 into 60 mL of  
444 fresh LB and grown in a 37 °C incubator with shaking until an absorbance of 3.0

445 ( $\lambda = 600$  nm). We calculated the volume of the culture needed for resuspension in  
446 200  $\mu$ L of fresh LB medium for a final absorbance of 248 OD. This volume of cells  
447 was spun down at  $800 \times g$  for 10 min, the supernatant was removed, and the  
448 pellet was resuspended in fresh LB media. A 2-fold dilution series was made  
449 from 240 OD to 0.007 OD. Five microliters of diluted culture were inoculated  
450 into agarose for a final cell density in the plate of 8 OD-0.0004 OD. The OD ( $\lambda =$   
451 595 nm) was measured immediately using a Tecan M200 PRO plate reader.

452

#### 453 **Measurement of SOS using a promoter-fusion assay**

454 To measure SOS induction we used the plasmids pUA66-*sulA* promoter-GFP  
455 (p*SulA*-GFP) and the empty vector control pUA66-GFP (pUA66) transformed in  
456 the Keio parent strain *E.coli* BW25113 and the Keio strains ( $\Delta mrcB$ ,  $\Delta lpoB$ ,  $\Delta hscA$ ,  
457  $\Delta hfq$ ,  $\Delta iscA$ ,  $\Delta recA$ ). Three biological replicates of wildtype cells and Keio strains  
458 containing p*SulA*-GFP and pUA66 were inoculated from a plate of overnight  
459 cultures in LB and grown at 37 °C in an incubator with shaking. The GRABS  
460 assay was carried out as described above. As a positive control to test the effects  
461 of inducing the SOS response, norfloxacin was added at three times the  
462 minimum inhibitory concentration (30 ng/mL) to wild-type cells grown in liquid  
463 and embedded in agarose. OD was measured at  $\lambda = 595$  nm and GFP

464 fluorescence was measured with excitation at 485 nm and emission at 515 nm  
465 using a Tecan M200 PRO plate reader at 10 min intervals for 8 h.  
466  
467 Analysis of SOS induction was performed by first normalizing the data to  
468 fluorescence intensity per cell for p*SulA*-GFP and pUA66 at each time point ( $t$ )  
469 using the ratio (fluorescence intensity( $t$ )/optical density( $t$ )). We corrected for  
470 basal GFP expression by subtracting normalized fluorescence values of pUA66  
471 from p*SulA*-GFP at each time point:  $(pSulA-GFP_{normalized}(t) - pUA66_{normalized}(t))$ . 3  
472 biological replicates were averaged at each time point. We subtracted average  
473 fluorescence values at  $t = 0$  from each subsequent time point to monitor changes  
474 in SOS induction for 1% agarose and liquid.

475 **Supplemental References**

476

477 Amir, A., Babaeipour, F., McIntosh, D.B., Nelson, D.R., and Jun, S. (2014).

478 Bending forces plastically deform growing bacterial cell walls. *Proceedings of the*

479 *National Academy of Sciences of the United States of America* 111, 5778-5783.

480 Baba, T., Ara, T., Hasegawa, M., Takai, Y., Okumura, Y., Baba, M., Datsenko,

481 K.A., Tomita, M., Wanner, B.L., and Mori, H. (2006). Construction of *Escherichia*

482 *coli* K-12 in-frame, single-gene knockout mutants: the Keio collection. *Mol Syst*

483 *Biol* 2, 2006 0008.

484 Brown, P.J., de Pedro, M.A., Kysela, D.T., Van der Henst, C., Kim, J., De Bolle, X.,

485 Fuqua, C., and Brun, Y.V. (2012). Polar growth in the Alphaproteobacterial order

486 Rhizobiales. *Proc Natl Acad Sci USA* 109, 1697-1701.

487 Desmarais, S.M., Cava, F., de Pedro, M.A., and Huang, K.C. (2014). Isolation and

488 preparation of bacterial cell walls for compositional analysis by ultra

489 performance liquid chromatography. *J Vis Exp*, e51183.

490 Desmarais, S.M., Tropini, C., Miguel, A., Cava, F., Monds, R.D., de Pedro, M.A.,

491 and Huang, K.C. (2015). High-throughput, Highly Sensitive Analyses of Bacterial

492 Morphogenesis Using Ultra Performance Liquid Chromatography. *The Journal*

493 *of biological chemistry* 290, 31090-31100.

494 Edelstein, A., Amodaj, N., Hoover, K., Vale, R., and Stuurman, N. (2010).  
495 Computer control of microscopes using microManager. *Current protocols in*  
496 *molecular biology* / edited by Frederick M Ausubel [et al] *Chapter 14, Unit14* 20.

497 Nichols, R.J., Sen, S., Choo, Y.J., Beltrao, P., Zietek, M., Chaba, R., Lee, S.,  
498 Kazmierczak, K.M., Lee, K.J., Wong, A., *et al.* (2011). Phenotypic landscape of a  
499 bacterial cell. *Cell* *144*, 143-156.

500 Ottolenghi, A.C., Caparros, M., and de Pedro, M.A. (1993). Peptidoglycan  
501 tripeptide content and cross-linking are altered in *Enterobacter cloacae* induced  
502 to produce AmpC beta-lactamase by glycine and D-amino acids. *J Bacteriol* *175*,  
503 1537-1542.

504 Philippe, N., Alcaraz, J.P., Coursange, E., Geiselman, J., and Schneider, D.  
505 (2004). Improvement of pCVD442, a suicide plasmid for gene allele exchange in  
506 bacteria. *Plasmid* *51*, 246-255.

507 Pisabarro, A.G., de Pedro, M.A., and Vazquez, D. (1985). Structural modifications  
508 in the peptidoglycan of *Escherichia coli* associated with changes in the state of  
509 growth of the culture. *J Bacteriol* *161*, 238-242.

510 Sliusarenko, O., Heinritz, J., Emonet, T., and Jacobs-Wagner, C. (2011). High-  
511 throughput, subpixel precision analysis of bacterial morphogenesis and  
512 intracellular spatio-temporal dynamics. *Mol Microbiol* 80, 612-627.

513 Tuson, H.H., Auer, G.K., Renner, L.D., Hasebe, M., Tropini, C., Salick, M., Crone,  
514 W.C., Gopinathan, A., Huang, K.C., and Weibel, D.B. (2012). Measuring the  
515 stiffness of bacterial cells from growth rates in hydrogels of tunable elasticity.  
516 *Mol Microbiol* 84, 874-891.

517 Ursell, T.S., Nguyen, J., Monds, R.D., Colavin, A., Billings, G., Ouzounov, N.,  
518 Gitai, Z., Shaevitz, J.W., and Huang, K.C. (2014). Rod-like bacterial shape is  
519 maintained by feedback between cell curvature and cytoskeletal localization.  
520 *Proceedings of the National Academy of Sciences of the United States of America*  
521 111, E1025-1034.

522
